# Supplementary material
Source: PubMed Central journal article supplement (PMC6453182)
Supplement: ESO683780_supplemental_material.pdf [file ESO683780_supplemental_material.pdf]

## **Supplemental Material**

**Supplement I) Published TTO-based valuation models with country, reference and sample size from which they were elicited.**

| Variable             | TTO Value Set   |                    |                          |                      |                       |                  |                      |                    |                      |                           |                     |                         |                         |
|----------------------|-----------------|--------------------|--------------------------|----------------------|-----------------------|------------------|----------------------|--------------------|----------------------|---------------------------|---------------------|-------------------------|-------------------------|
|                      | UK <sup>2</sup> | Spain <sup>5</sup> | Netherlands <sup>6</sup> | Germany <sup>7</sup> | Zimbabwe <sup>8</sup> | USA <sup>3</sup> | Denmark <sup>1</sup> | Japan <sup>9</sup> | Poland <sup>10</sup> | South Korea <sup>11</sup> | China <sup>12</sup> | Singapore <sup>13</sup> | Australia <sup>14</sup> |
| <b>N2 (Constant)</b> | -0.081          | -0.024             | -0.071                   | -0.001               | -0.100                | -                | -0.114               | -0.152             | -0.049               | 0.050                     | -0.039              | -                       | -                       |
| <b>N3</b>            | -0.269          | -0.291             | -0.234                   | -0.323               | -                     | -                | -                    | -                  | -                    | 0.050                     | -0.022              | -0.2905                 | -                       |
| <b>MO2</b>           | -0.069          | -0.106             | -0.036                   | -0.099               | -0.056                | -0.146           | -0.053               | -0.075             | -0.052               | 0.096                     | -0.099              | -0.1678                 | -0.080                  |
| <b>MO3</b>           | -0.314          | -0.430             | -0.161                   | -0.327               | -0.204                | -0.558           | -0.411               | -0.418             | -0.331               | 0.418                     | -0.246              | -0.3040                 | -0.372                  |
| <b>SC2</b>           | -0.104          | -0.134             | -0.082                   | -0.087               | -0.092                | -0.175           | -0.063               | -0.054             | -0.054               | 0.046                     | -0.105              | -0.1615                 | -0.109                  |
| <b>SC3</b>           | -0.214          | -0.309             | -0.152                   | -0.174               | -0.231                | -0.471           | -0.192               | -0.063             | -0.235               | 0.136                     | -0.208              | -0.3465                 | -0.291                  |
| <b>UA2</b>           | -0.036          | -0.071             | -0.032                   | -                    | -0.043                | -0.140           | -0.048               | -0.044             | -0.046               | 0.051                     | -0.074              | -0.2555                 | -0.072                  |
| <b>UA3</b>           | -0.094          | -0.195             | -0.057                   | -                    | -0.135                | -0.374           | -0.144               | -0.133             | -0.212               | 0.208                     | -0.193              | -0.3209                 | -0.165                  |
| <b>PD2</b>           | -0.123          | -0.089             | -0.086                   | -0.112               | -0.067                | -0.173           | -0.062               | -0.080             | -0.057               | 0.037                     | -0.092              | -0.1462                 | -0.085                  |
| <b>PD3</b>           | -0.386          | -0.261             | -0.329                   | -0.315               | -0.302                | -0.537           | -0.396               | -0.194             | -0.489               | 0.151                     | -0.236              | -0.2291                 | -0.473                  |
| <b>AD2</b>           | -0.071          | -0.062             | -0.124                   | -                    | -0.046                | -0.156           | -0.068               | -0.063             | -0.026               | 0.043                     | -0.086              | -0.1501                 | -0.118                  |
| <b>AD3</b>           | -0.236          | -0.144             | -0.325                   | -0.065               | -0.173                | -0.450           | -0.367               | -0.112             | -0.207               | 0.158                     | -0.205              | -0.2905                 | -0.424                  |
| <b>D1</b>            | -               | -                  | -                        | -                    | -                     | +0.140           | -                    | -                  | -                    | -                         | -                   | -                       | -                       |
| <b>I2-sq</b>         | -               | -                  | -                        | -                    | -                     | -0.011           | -                    | -                  | -                    | -                         | -                   | -                       | -                       |
| <b>I3</b>            | -               | -                  | -                        | -                    | -                     | +0.122           | -                    | -                  | -                    | -                         | -                   | -                       | -                       |
| <b>I3-sq</b>         | -               | -                  | -                        | -                    | -                     | +0.015           | -                    | -                  | -                    | -                         | -                   | -                       | -                       |
| <b>MO3_SC3</b>       | -               | -                  | -                        | -                    | -                     | -                | -                    | -                  | -                    | -                         | -                   | -                       | 0.061                   |
| <b>MO3_UA3</b>       | -               | -                  | -                        | -                    | -                     | -                | -                    | -                  | -                    | -                         | -                   | -                       | -0.031                  |
| <b>MO3_PD3</b>       | -               | -                  | -                        | -                    | -                     | -                | -                    | -                  | -                    | -                         | -                   | -                       | 0.094                   |
| <b>MO3_AD3</b>       | -               | -                  | -                        | -                    | -                     | -                | -                    | -                  | -                    | -                         | -                   | -                       | 0.016                   |
| <b>SC3_UA3</b>       | -               | -                  | -                        | -                    | -                     | -                | -                    | -                  | -                    | -                         | -                   | -                       | -0.050                  |
| <b>SC3_PD3</b>       | -               | -                  | -                        | -                    | -                     | -                | -                    | -                  | -                    | -                         | -                   | -                       | 0.100                   |
| <b>SC3_AD3</b>       | -               | -                  | -                        | -                    | -                     | -                | -                    | -                  | -                    | -                         | -                   | -                       | 0.104                   |
| <b>UA3_PD3</b>       | -               | -                  | -                        | -                    | -                     | -                | -                    | -                  | -                    | -                         | -                   | -                       | 0.032                   |
| <b>UA3_AD3</b>       | -               | -                  | -                        | -                    | -                     | -                | -                    | -                  | -                    | -                         | -                   | -                       | 0.060                   |
| <b>PD3_AD3</b>       | -               | -                  | -                        | -                    | -                     | -                | -                    | -                  | -                    | -                         | -                   | -                       | 0.186                   |

N2-at least one 2 or 3, N3-At least one 3, MO2-Mobility=2, MO3-Mobility=3, SC2-Self Care=2, SC3-Self Care=3, UA2-UsualActivities=2, UA3-Usual Activities=3, PD2-Pain and discomfort=2, PD3-Pain and Discomfort=3, AD2-Anxiety and Depression=2 and AD3-Anxiety and Depression=3. For the USA, extra coefficients were added: D1-number of movements away from full health beyond the first, I2-The number of dimensions at level 2 beyond the first, I3-number of dimensions at level 3 beyond the first, I2-Sq-square of I2 and I3-Sq-square of I3. For the

Australian dataset, interactions added included MO3\_SC3 (interaction between Mobility=3 and Self Care=3). For the Australian utility weights we used model 3b; model 3 with the constant included elicited unusual values so it was rejected in favour of the model without.

## Supplement II) Case Mix at baseline, Stratified by Country of Inclusion

|                                      | Median [IQR]* |                             |                     |                             |            | Freq (%)        |              |                     |              |            |                       |                    |                    |  |
|--------------------------------------|---------------|-----------------------------|---------------------|-----------------------------|------------|-----------------|--------------|---------------------|--------------|------------|-----------------------|--------------------|--------------------|--|
|                                      | Age           | Baseline NIHSS <sup>†</sup> | mRS <sup>‡</sup> 90 | EQ-5D-3L <sup>§</sup> Proxy | Male Sex   | Left Hemisphere | Prior Stroke | Rt-PA <sup>  </sup> | Hypertension | Diabetes   | Prior MI <sup>#</sup> | AFIB <sup>**</sup> | CHF <sup>***</sup> |  |
| <b>Australia/ New Zealand (n=82)</b> | 71 [59,79]    | 13 [8,16]                   | 3 [2,4]             | 17 (21)                     | 39 (47.6)  | 40 (48.8)       | 8 (9.8)      | 38 (46.3)           | 60 (73.2)    | 11 (13.4)  | 13 (15.9)             | 24 (29.3)          | 9 (11)             |  |
| <b>Austria (n=57)</b>                | 70 [57,77]    | 10 [7,15]                   | 2 [1,4]             | 12 (21.1)                   | 34 (59.7)  | 29 (50.9)       | 5 (8.8)      | 35 (61.4)           | 36 (63.2)    | 11 (19.3)  | 7 (12.3)              | 17 (29.8)          | 7 (12.3)           |  |
| <b>Belgium (n=106)</b>               | 74 [65,79]    | 14 [9,19]                   | 3 [2,4]             | 23 (21.9)                   | 53 (50)    | 48 (45.3)       | 13 (12.3)    | 59 (55.7)           | 61 (57.6)    | 17 (16)    | 14 (13.2)             | 33 (31.1)          | 7 (6.6)            |  |
| <b>Brazil (n=44)</b>                 | 71 [56.5,79]  | 13 [8,20]                   | 2 [0,4]             | 19 (44.2)                   | 20 (45.5)  | 24 (54.6)       | 9 (20.5)     | 29 (65.9)           | 36 (81.8)    | 8 (18.2)   | 5 (11.4)              | 9 (20.5)           | 3 (6.8)            |  |
| <b>Bulgaria (n=117)</b>              | 67 [60,72]    | 8 [7,11]                    | 2 [1,3]             | 22 (18.8)                   | 73 (62.4)  | 52 (44.4)       | 22 (18.8)    | 0 (0)               | 99 (84.6)    | 24 (20.5)  | 8 (6.8)               | 21 (18)            | 24 (20.5)          |  |
| <b>Canada (n=298)</b>                | 72.5 [62,79]  | 12 [9,17]                   | 3 [1,4]             | 80 (26.9)                   | 155 (52)   | 129 (43.4)      | 56 (18.8)    | 201 (67.5)          | 223 (74.8)   | 62 (20.8)  | 45 (15.1)             | 70 (23.5)          | 23 (7.7)           |  |
| <b>China (n=62)</b>                  | 68.5 [56,76]  | 11 [7,15]                   | 3 [2,4]             | 19 (31.2)                   | 41 (66.1)  | 28 (45.2)       | 15 (24.2)    | 7 (11.3)            | 40 (64.5)    | 12 (19.4)  | 3 (4.8)               | 13 (21)            | 1 (1.6)            |  |
| <b>Czech Republic (n=425)</b>        | 70 [60,76]    | 8 [7,11]                    | 2 [1,3]             | 34 (8)                      | 244 (57.4) | 196 (46.1)      | 80 (18.8)    | 98 (23.1)           | 330 (77.7)   | 107 (25.2) | 55 (12.9)             | 80 (18.8)          | 6 (1.4)            |  |
| <b>France (n=86)</b>                 | 64 [51,75]    | 14 [9,19]                   | 3 [1,4]             | 7 (8.1)                     | 49 (57)    | 44 (51.2)       | 8 (9.3)      | 42 (48.8)           | 47 (54.7)    | 15 (17.4)  | 8 (9.3)               | 23 (26.7)          | 4 (4.7)            |  |
| <b>Germany (n=138)</b>               | 66 [58,77]    | 10 [8,13]                   | 2 [1,4]             | 11 (8.1)                    | 89 (64.5)  | 45 (32.6)       | 16 (11.6)    | 85 (61.6)           | 109 (79)     | 24 (17.4)  | 13 (9.4)              | 26 (18.8)          | 11 (8)             |  |
| <b>Hungary (n=167)</b>               | 67 [59,75]    | 9 [8,12]                    | 1 [1,3]             | 10 (6)                      | 96 (57.5)  | 93 (55.7)       | 26 (15.6)    | 56 (33.5)           | 132 (79)     | 25 (15)    | 14 (8.4)              | 32 (19.2)          | 8 (4.8)            |  |
| <b>Israel (n=133)</b>                | 69 [58,77]    | 11 [8,16]                   | 3 [2,4]             | 49 (37.7)                   | 74 (55.6)  | 66 (49.6)       | 29 (21.8)    | 36 (27.1)           | 98 (73.7)    | 44 (33.1)  | 18 (13.5)             | 27 (20.3)          | 13 (9.8)           |  |
| <b>Philippines (n=95)</b>            | 63 [52,70]    | 10 [7,15]                   | 2 [1,4]             | 30 (31.6)                   | 40 (42.1)  | 51 (53.7)       | 22 (23.2)    | 2 (2.1)             | 77 (81.1)    | 26 (27.4)  | 5 (5.3)               | 16 (16.8)          | 4 (4.2)            |  |
| <b>Poland (n=92)</b>                 | 70 [60.5,76]  | 11.5 [9,15]                 | 2 [1,3]             | 26 (28.3)                   | 50 (54.4)  | 36 (39.1)       | 14 (15.2)    | 12 (13)             | 65 (70.7)    | 23 (25)    | 10 (10.9)             | 28 (30.4)          | 9 (9.8)            |  |
| <b>Portugal (n=111)</b>              | 70 [59,77]    | 15 [9,18]                   | 3 [2,4]             | 42 (39.3)                   | 48 (43.2)  | 59 (53.2)       | 31 (27.9)    | 20 (18)             | 76 (68.5)    | 16 (14.4)  | 4 (3.6)               | 25 (22.5)          | 9 (8.1)            |  |
| <b>Russia (n=87)</b>                 | 68 [58,77]    | 8 [7,12]                    | 2 [1,3]             | 21 (24.1)                   | 54 (62.1)  | 51 (58.6)       | 24 (27.6)    | 0 (0)               | 79 (90.8)    | 9 (10.3)   | 18 (20.7)             | 25 (28.7)          | 3 (3.5)            |  |
| <b>Singapore (n=56)</b>              | 66 [54,75]    | 15 [9,19]                   | 3 [1,4]             | 32 (57.1)                   | 34 (60.7)  | 26 (46.4)       | 8 (14.3)     | 2 (3.6)             | 34 (60.7)    | 18 (32.1)  | 5 (8.9)               | 10 (17.9)          | 2 (3.6)            |  |
| <b>Slovak Republic</b>               | 70 [59,76]    | 8 [6,10]                    | 1 [1,4]             | 2 (0.8)                     | 135 (54.2) | 109 (43.8)      | 58 (23.3)    | 25 (10)             | 218 (87.6)   | 63 (25.3)  | 29 (11.7)             | 50 (20)            | 2 (0.8)            |  |

| <b>(n=249)</b>             |                  |                |             |            |            |            |            |            |            |            |           |            |            |
|----------------------------|------------------|----------------|-------------|------------|------------|------------|------------|------------|------------|------------|-----------|------------|------------|
| <b>Spain (n=287)</b>       | 72 [63,78]       | 14 [10,18]     | 3 [1,4]     | 100 (37.2) | 161 (56.1) | 124 (43.9) | 40 (13.9)  | 141 (49.1) | 175 (61)   | 59 (20.6)  | 11 (3.8)  | 63 (22)    | 15 (5.2)   |
| <b>Switzerland (n=105)</b> | 70 [61,77]       | 12 [7,17]      | 2 [1,4]     | 27 (27.8)  | 70 (66.7)  | 43 (41)    | 16 (15.2)  | 84 (80)    | 72 (68.6)  | 20 (19.1)  | 15 (14.3) | 33 (31.4)  | 6 (5.7)    |
| <b>Taiwan (n=53)</b>       | 75 [65,78]       | 12 [9,16]      | 3 [1,4]     | 22 (41.5)  | 34 (64.2)  | 22 (41.5)  | 19 (35.9)  | 13 (24.5)  | 40 (75.5)  | 11 (20.8)  | 5 (9.4)   | 11 (20.8)  | 4 (7.6)    |
| <b>UK (72)</b>             | 70 [59.5,76]     | 15 [10,19]     | 3 [2.5,4]   | 14 (19.7)  | 36 (50)    | 41 (56.9)  | 13 (18.1)  | 39 (54.2)  | 36 (50)    | 6 (8.3)    | 5 (6.9)   | 17 (23.6)  | 3 (4.2)    |
| <b>USA (n=792)</b>         | 70 [58,78]       | 12 [8,17]      | 2 [1,4]     | 163 (21)   | 420 (53)   | 376 (47.5) | 200 (25.3) | 447 (56.4) | 633 (79.9) | 203 (25.6) | 143 (18)  | 211 (26.6) | 121 (15.3) |
| <b>Argentina (n=16)</b>    | 65 [55.5,71]     | 11 [7,16]      | 3 [2,4]     | 4(25)      | 11 (68.8)  | 12 (75)    | 3 (18.8)   | 2 (12.5)   | 8 (50)     | 4 (25)     | 0 (0)     | 3 (18.8)   | 1 (6.3)    |
| <b>Chile (n=10)</b>        | 72.5 [56,81]     | 15.5 [14,20]   | 2.5 [2,4]   | 3 (30)     | 5 (50)     | 7 (70)     | 2 (20)     | 6 (60)     | 6 (60)     | 0(0)       | 0 (0)     | 1 (10)     | 0(0)       |
| <b>Finland (n=18)</b>      | 72 [59,76]       | 12.5 [9,16]    | 3 [1,4]     | 4 (22.2)   | 9 (50)     | 9 (50)     | 2 (11.1)   | 9 (50)     | 9 (50)     | 3 (16.7)   | 5 (27.8)  | 4 (22.2)   | 6 (33.3)   |
| <b>Greece (n=24)</b>       | 72.5 [66.5,78]   | 10 [7,14]      | 3 [1,4]     | 6 (25)     | 11 (45.8)  | 9 (37.5)   | 5 (20.8)   | 1 (4.2)    | 20 (83.3)  | 7 (29.2)   | 1 (4.2)   | 9 (37.5)   | 1 (4.2)    |
| <b>Hong Kong (n=25)</b>    | 71 [62,74]       | 12 [10,19]     | 4 [2,4]     | 10 (40)    | 15 (60)    | 9 (36)     | 3 (12)     | 1 (4)      | 18 (72)    | 7 (28)     | 0 (0)     | 10 (40)    | 0 (0)      |
| <b>Italy (n=25)</b>        | 71 [61,78]       | 10 [7,12]      | 1 [0,3]     | 2 (10)     | 11 (44)    | 15 (60)    | 6 (24)     | 10 (40)    | 18 (72)    | 4 (16)     | 2 (8)     | 7 (28)     | 3 (12)     |
| <b>Malaysia (n=12)</b>     | 62.5 [47,71]     | 11.5 [10,14.5] | 3 [1.5,4.5] | 4 (33.3)   | 8 (66.7)   | 6 (50)     | 1 (8.3)    | 0 (0)      | 7 (58.3)   | 5 (41.7)   | 0 (0)     | 0 (0)      | 0 (0)      |
| <b>Mexico (n=24)</b>       | 66.5 [47.5,78.5] | 11.5 [7,15]    | 2 [1,3]     | 9 (37.5)   | 9 (37.5)   | 12 (50)    | 7 (29.2)   | 8 (33.3)   | 11 (45.8)  | 6 (25)     | 1 (4.2)   | 2 (8.3)    | 0 (0)      |
| <b>Netherlands (n=27)</b>  | 73 [65,75]       | 13 [9,16]      | 3 [2,4]     | 4 (14.8)   | 19 (70.4)  | 13 (48.2)  | 6 (22.2)   | 13 (48.2)  | 12 (44.4)  | 2 (7.4)    | 4 (14.8)  | 4 (14.8)   | 1 (3.7)    |
| <b>Norway (n=4)</b>        | 71.5 [63,74.5]   | 17 [10,22]     | 3.5 [2,4.5] | 3 (75)     | 3 (75)     | 1 (25)     | 0 (0)      | 3 (75)     | 3 (75)     | 0 (0)      | 0 (0)     | 1 (25)     | 0 (0)      |
| <b>South Africa (n=43)</b> | 57 [50,78]       | 10 [8,15]      | 1 [1,3]     | 7 (16.7)   | 25 (58.1)  | 19 (44.2)  | 5 (11.6)   | 4 (9.3)    | 28 (65.1)  | 8 (18.6)   | 2 (4.7)   | 13 (30.2)  | 1 (2.3)    |
| <b>South Korea (n=32)</b>  | 36 [59,72]       | 11 [8,15.5]    | 2.5 [1,4]   | 8 (25.8)   | 10 (31.3)  | 13 (40.6)  | 6 (18.8)   | 15 (46.9)  | 19 (59.4)  | 10 (31.3)  | 3 (9.4)   | 10 (31.3)  | 2 (6.3)    |
| <b>Sweden (n=19)</b>       | 79 [72,83]       | 14 [10,17]     | 3 [1,4]     | 8 (44.4)   | 9 (47.4)   | 9 (47.4)   | 2 (10.5)   | 4 (21.1)   | 5 (26.3)   | 4 (21.1)   | 7 (36.8)  | 7 (36.8)   | 1 (5.3)    |

\*Interquartile Range

†National Institutes of Health Stroke Scale

‡Modified Rankin Scale

§European Quality of Life Scale

|| Recombinant Tissue Plasminogen Activator

# Myocardial Infarction

\*\* Atrial Fibrillation

#Congestive Heart Failure

**Supplement III) Mean HU derived using EQ-5D-3L (subject respondents only), applying each published value set to the international population, and stratified by mRS at 3 months (HU displayed as mean (StdDev))**

| Value Set applied across respondents-only population | Modified Rankin Scale Score at 3 months |             |             |             |              |              |
|------------------------------------------------------|-----------------------------------------|-------------|-------------|-------------|--------------|--------------|
|                                                      | 0 (n=516)                               | 1 (n=840)   | 2 (n=571)   | 3 (n=508)   | 4 (n=488)    | 5 (n=82)     |
| Australia                                            | 0.93 (0.13)                             | 0.86 (0.16) | 0.76 (0.18) | 0.61 (0.2)  | 0.39 (0.27)  | 0.02 (0.2)   |
| China                                                | 0.92 (0.12)                             | 0.85 (0.15) | 0.73 (0.16) | 0.59 (0.17) | 0.40 (0.19)  | 0.15 (0.16)  |
| Denmark                                              | 0.91 (0.15)                             | 0.83 (0.16) | 0.73 (0.16) | 0.62 (0.18) | 0.41 (0.29)  | -0.00 (0.28) |
| Germany                                              | 0.95 (0.11)                             | 0.90 (0.14) | 0.83 (0.18) | 0.69 (0.22) | 0.42 (0.27)  | 0.09 (0.19)  |
| Netherlands                                          | 0.91 (0.16)                             | 0.83 (0.18) | 0.73 (0.2)  | 0.60 (0.23) | 0.39 (0.25)  | 0.12 (0.2)   |
| Poland                                               | 0.94 (0.11)                             | 0.89 (0.12) | 0.81 (0.14) | 0.70 (0.19) | 0.47 (0.29)  | 0.07 (0.29)  |
| Singapore                                            | 0.88 (0.21)                             | 0.74 (0.28) | 0.51 (0.3)  | 0.24 (0.31) | -0.10 (0.33) | -0.47 (0.2)  |
| South Korea                                          | 0.94 (0.1)                              | 0.88 (0.11) | 0.80 (0.12) | 0.69 (0.14) | 0.46 (0.24)  | 0.10 (0.19)  |

|          |             |             |             |             |             |              |
|----------|-------------|-------------|-------------|-------------|-------------|--------------|
| Spain    | 0.93 (0.14) | 0.85 (0.18) | 0.72 (0.21) | 0.52 (0.27) | 0.15 (0.36) | -0.33 (0.24) |
| UK       | 0.90 (0.17) | 0.82 (0.19) | 0.70 (0.22) | 0.54 (0.26) | 0.24 (0.31) | -0.14 (0.24) |
| USA      | 0.92 (0.12) | 0.85 (0.14) | 0.77 (0.15) | 0.65 (0.17) | 0.44 (0.22) | 0.14 (0.16)  |
| Zimbabwe | 0.92 (0.12) | 0.85 (0.13) | 0.75 (0.13) | 0.64 (0.14) | 0.48 (0.19) | 0.22 (0.18)  |



**Supplement IV) Mean HU estimates generated using country-specific value sets applied to appropriate populations, and stratified by mRS at 3 months (HU displayed as mean (StdDev))**

| Populations Analysed                                            | Value Set Applied  | Modified Rankin Scale Score at day 90 at day 90 |             |             |             |             |              |
|-----------------------------------------------------------------|--------------------|-------------------------------------------------|-------------|-------------|-------------|-------------|--------------|
|                                                                 |                    | 0                                               | 1           | 2           | 3           | 4           | 5            |
| <b>Australia &amp; New Zealand</b><br>(n=80)                    | <b>Australia</b>   | 0.96 (0.05)                                     | 0.82 (0.18) | 0.77 (0.18) | 0.58 (0.20) | 0.49 (0.17) | 0.02 (0.14)  |
| <b>China, Hong Kong, Taiwan</b><br>(n=138)                      | <b>China</b>       | 0.95 (0.08)                                     | 0.87 (0.14) | 0.79 (0.15) | 0.60 (0.16) | 0.34 (0.19) | 0.17 (0.21)  |
| <b>Finland, Norway, Sweden</b><br>(n=40)                        | <b>Denmark</b>     | 0.90 (0.12)                                     | 0.82 (0.09) | 0.92 (0.12) | 0.60 (0.16) | 0.37 (0.22) | -0.22 (0.28) |
| <b>Germany, Italy, Austria,<br/>Greece, Switzerland (n=325)</b> | <b>Germany</b>     | 0.98 (0.04)                                     | 0.93 (0.13) | 0.86 (0.17) | 0.65 (0.24) | 0.46 (0.24) | 0.03 (0.15)  |
| <b>Netherlands, France, Belgium</b><br>(n=215)                  | <b>Netherlands</b> | 0.89 (0.10)                                     | 0.83 (0.19) | 0.75 (0.15) | 0.61 (0.21) | 0.34 (0.30) | 0.12 (0.21)  |
| <b>Poland, Hungary, Bulgaria,</b>                               | <b>Poland</b>      | 0.96 (0.06)                                     | 0.90 (0.10) | 0.83 (0.10) | 0.73 (0.14) | 0.39 (0.29) | 0.01 (0.26)  |

|                                                                       |                    |             |             |             |             |              |              |
|-----------------------------------------------------------------------|--------------------|-------------|-------------|-------------|-------------|--------------|--------------|
| <b>Czech Republic, Slovak Republic, Russia (n=1133)</b>               |                    |             |             |             |             |              |              |
| <b>Singapore, Malaysia, Philippines (n=160)</b>                       | <b>Singapore</b>   | 0.96 (0.09) | 0.81 (0.21) | 0.47 (0.26) | 0.24 (0.33) | -0.23 (0.29) | -0.48 (0.17) |
| <b>South Korea (n=32)</b>                                             | <b>South Korea</b> | 0.93 (0.04) | 0.86 (0.09) | 0.80 (0.07) | 0.66 (0.17) | 0.41 (0.25)  | 0.27 (0.46)  |
| <b>Spain, Portugal (n=377)</b>                                        | <b>Spain</b>       | 0.88 (0.17) | 0.86 (0.16) | 0.67 (0.27) | 0.48 (0.30) | 0.08 (0.40)  | -0.33 (0.28) |
| <b>UK (n=70)</b>                                                      | <b>UK</b>          | 0.81 (0.13) | 0.90 (0.11) | 0.72 (0.15) | 0.42 (0.27) | 0.19 (0.29)  | -0.20 (0.19) |
| <b>USA, Canada, Brazil, Mexico, Argentina, Chile, Israel (n=1246)</b> | <b>USA</b>         | 0.89 (0.16) | 0.83 (0.15) | 0.75 (0.16) | 0.65 (0.19) | 0.44 (0.22)  | 0.15 (0.14)  |
| <b>South Africa (n=43)</b>                                            | <b>Zimbabwe</b>    | 0.94 (0.12) | 0.84 (0.14) | 0.77 (0.13) | 0.58 (0.10) | 0.53 (0.20)  | 0.25 (0.05)  |
